# Supplementary material for: A recipe for new organometallic polymers and oligomers? Synthesis and structure of an oligo- and a polymeric arrangement of P–S anions
Source: Royal Society of Chemistry journal article supplement (doi:10.1039/b617177j), 2007-01-01
Supplement: b617177j.pdf [file b617177j.pdf]

# Supplementary information A recipe for new organometallic polymers and oligomers? Synthesis and structures of oligo- and polymeric arrangements of P-S anions

Oliver Hampe<sup>a</sup>, Alexander Rothenberger<sup>a,b,\*</sup>, Maryam Shafaei-Fallah<sup>a</sup> and Weifeng Shi<sup>a</sup>

<sup>5</sup> *Receipt/Acceptance Data* [DO NOT ALTER/DELETE THIS TEXT]

*Publication data* [DO NOT ALTER/DELETE THIS TEXT]

DOI: 10.1039/b000000x [DO NOT ALTER/DELETE THIS TEXT]

## Experimental

All operations were carried out in an atmosphere of purified  
<sup>10</sup> dinitrogen. Solvents were dried and freshly distilled prior to use.  
 P<sub>2</sub>S<sub>5</sub> and Davy's reagent were purchased from Aldrich. AgS<sup>i</sup>Pr was  
 prepared according to a published procedure.<sup>1</sup>

<sup>1</sup>: 0.18 mg (1.00 mmol) AgS<sup>i</sup>Pr and 0.40 g (1.00 mmol) Dppe were  
<sup>15</sup> dissolved in 8 mL THF. Separately, a yellow suspension of 0.22 g  
 (0.50 mmol) Davy's reagent in 4 mL of THF is prepared and added  
 to the solution of AgS<sup>i</sup>Pr and Dppe. The reaction is stirred for 2  
 hours and filtered. Crystals can be obtained by careful dropwise  
<sup>20</sup> addition of diethylether to the stirring reaction mixture until a  
 cloudy precipitate starts to form. The mixture is then stored at room  
 temperature for three weeks before crystals of **1** can be isolated  
 together with a colourless precipitate (30 mg, 10% based on AgS<sup>i</sup>Pr  
 supplied) (Found C, 41.8; H, 3.6. C<sub>255</sub>H<sub>263</sub>Ag<sub>24</sub>P<sub>17</sub>S<sub>33</sub> requires C,  
<sup>25</sup> 40.9; H, 3.5);  $\delta_{\text{P}}$ (161.975 MHz, CDCl<sub>3</sub>, 25°C, H<sub>3</sub>PO<sub>4</sub>) 132.8, 125.3,  
 115.5 ([PS<sub>4</sub>]<sup>3-</sup>), 103.3 (S<sub>3</sub>PS<sup>i</sup>Bu), 44.5, 32.6 (Ph<sub>2</sub>P(S)-), 0 br (Ph<sub>2</sub>P).

<sup>2</sup>: A mixture of P<sub>2</sub>S<sub>5</sub> 222 mg (1.00 mmol) and NaS<sup>i</sup>Bu 448 mg  
 (4.00 mmol) was dissolved in 12 mL DME. The mixture was  
 stirred overnight and the filtrate was layered with 60 mL hexane.  
<sup>30</sup> Storage of this solution at room temperature for one week produced  
 colorless crystals of **2** (0.48 g, 68% based on NaS<sup>i</sup>Bu supplied);  
 found C, 25.7; H, 4.9. C<sub>14</sub>H<sub>33</sub>Na<sub>4</sub>O<sub>3</sub>P<sub>2</sub>S<sub>8</sub> (**2**-0.5DME) requires C,  
 25.5; H, 5.0; m.p. 120°C (decomposition);  $\delta_{\text{H}}$ (400 MHz, [D<sub>8</sub>]THF,  
 25°C, TMS) 3.46 (s, 4H, CH<sub>2</sub>O), 3.31 (s, 6H, OCH<sub>3</sub>), 1.63 (s, 9H,  
<sup>35</sup> S<sup>i</sup>Bu);  $\delta_{\text{C}}$ (100 MHz, [D<sub>8</sub>]THF, 25°C) 71.76 (O-CH<sub>2</sub>), 57.98 (O-  
 CH<sub>3</sub>), 49.27, 49.21 (S-C), 31.52, 31.48 (CH<sub>3</sub>);  $\delta_{\text{P}}$ (161.975 MHz,  
 [D<sub>8</sub>]THF, 25°C, H<sub>3</sub>PO<sub>4</sub>) 93.3 (S<sub>3</sub>PS<sup>i</sup>Bu);  $\nu_{\text{max}}$ (NaCl, Nujol)/cm<sup>-1</sup>  
 1624s, 1245m, 1169s, 1034s, 855s, 602s.

<sup>40</sup> CCDC no. 623841 and 623842 contain the supplementary  
 crystallographic data for this paper. These data can be obtained free  
 of charge at [www.ccdc.cam.ac.uk/products/csd/request](http://www.ccdc.cam.ac.uk/products/csd/request) [or from the  
 Cambridge Crystallographic Data Centre, 12, Union Road,  
 Cambridge CB2 1EZ, UK; fax: (internat.) +44 1223/336 033; E-

<sup>a</sup> Institut für Nanotechnologie, Forschungszentrum Karlsruhe GmbH,  
 Postfach 3640, 76021 Karlsruhe, Germany

<sup>b</sup> Institut für Anorganische Chemie der Universität Karlsruhe, Geb. 30.45,  
 Engesserstr. 15a, 76131 Karlsruhe, Germany; E-mail:  
[ar252@chemie.uni-karlsruhe.de](mailto:ar252@chemie.uni-karlsruhe.de)

† Electronic Supplementary Information (ESI) available: [details of any  
 supplementary information available should be included here]. See  
<http://dx.doi.org/10.1039/b000000x/>

<sup>45</sup> mail: [deposit@ccdc.cam.ac.uk](mailto:deposit@ccdc.cam.ac.uk)].

## References

- <sup>50</sup> 1. I. G. Dance, K. J. Fisher, R. M. H. Banda and M. L. Scudder, *Inorg. Chem.*, 1991, 30, 183-187.

**Single column figure/scheme (below)**

X  
Fig./Scheme XX Caption.

**Double column figure/scheme (below)**

X  
Fig./Scheme XX Caption.

**Single column image (no caption) (below)**

X

55 **Double column image (no caption) (below)**

X

**Single column numbered equation/reaction (below)**

X (X)

**Single column table (below)**

Table XX Caption

X

<sup>a</sup> Footnote text.

**Double column table (below)**

Table XX Caption

X

<sup>a</sup> Footnote text.

60
